# Supplementary material
Source: publisher site journal article supplement (https://www.spandidos-publications.com/3852/downloadSupplementary)
Supplement: Supplementary file 1 [file downloadSupplementary]

Figure S1. Correlation between SLC7A5 mRNA expression and expression of genes related to breast cancer, hypoxia and cell metabolism in the Örebro cohort (n=80). Correlation between SLC7A5 expression and expression of (A) ESR1, (B) ERBB2, (C) MKI67, (D) MYC, (E) MTOR, (F) CCND1, (G) HIF1A, (H) VEGFA, (I) EPAS1, (J) LDHA, (K) SLC2A1, (L) CA9 and (M) NDUFA4L2. SLC7A5, solute carrier family 7 member 5; ESR1, estrogen receptor 1; ERBB2, Erb-B2 receptor tyrosine kinase 2; MYC, MYC proto-oncogene, BHLH transcription factor; MTOR, mechanistic target of rapamycin; MKI67, marker of proliferation Ki-67; CCND1, cyclin D1; HIF1A, hypoxia inducible factor 1 subunit alpha; EPAS1, endothelial PAS domain-containing protein 1; VEGFA, vascular endothelial growth factor A; LDHA, lactate dehydrogenase A; SLC2A1, solute carrier family 2, facilitated glucose transporter member 1; CAIX, carbonic anhydrase IX; NDUFA4L2, NDUFA4 mitochondrial complex associated like 2.

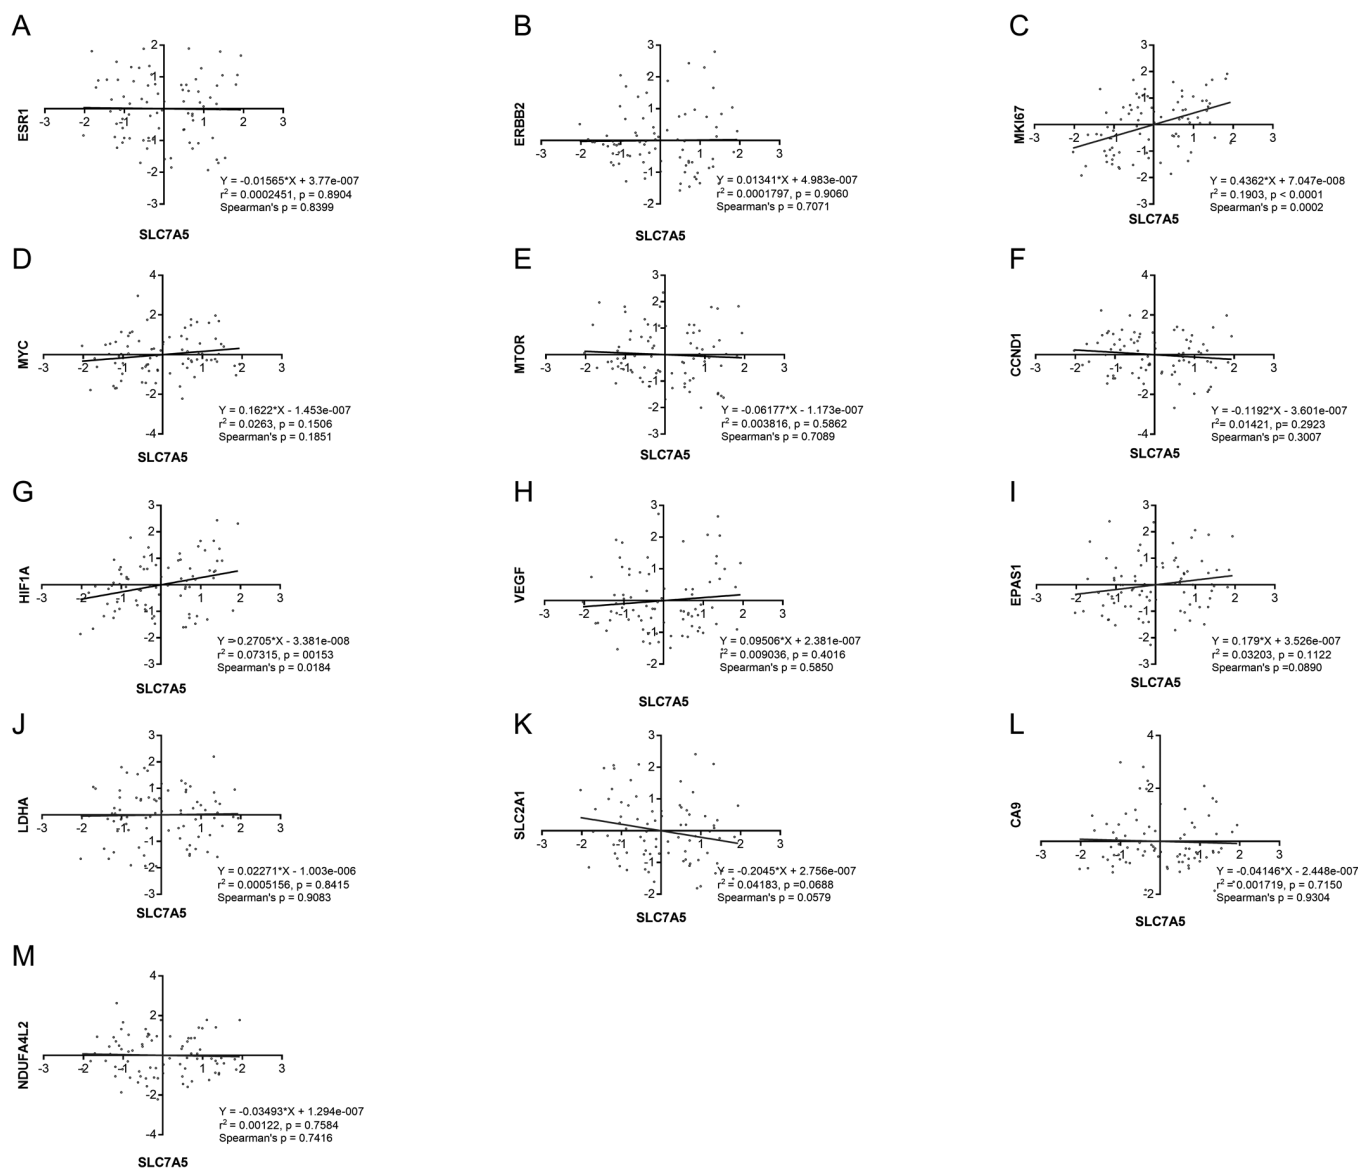

Figure S2. Correlation between SLC7A5 mRNA expression and expression of genes related to breast cancer, hypoxia and cell metabolism in ER<sup>+</sup> tumors as assessed with immunohistochemistry (METABRIC, n=1,445). Correlation between SLC7A5 expression and expression of (A) ESR1, (B) ERBB2, (C) MKI67, (D) MYC, (E) MTOR, (F) CCND1, (G) HIF1A, (H) VEGFA, (I) EPAS1, (J) LDHA, (K) SLC2A1, (L) CA9 and (M) NDUFA4L2. SLC7A5, solute carrier family 7 member 5; ESR1, estrogen receptor 1; ERBB2, Erb-B2 receptor tyrosine kinase 2; MYC, MYC proto-oncogene, BHLH transcription factor; MTOR, mechanistic target of rapamycin; MKI67, marker of proliferation Ki-67; CCND1, cyclin D1; HIF1A, hypoxia inducible factor 1 subunit alpha; EPAS1, endothelial PAS domain-containing protein 1; VEGFA, vascular endothelial growth factor A; LDHA, lactate dehydrogenase A; SLC2A1, solute carrier family 2, facilitated glucose transporter member 1; CAIX, carbonic anhydrase IX; NDUFA4L2, NDUFA4 mitochondrial complex associated like 2.

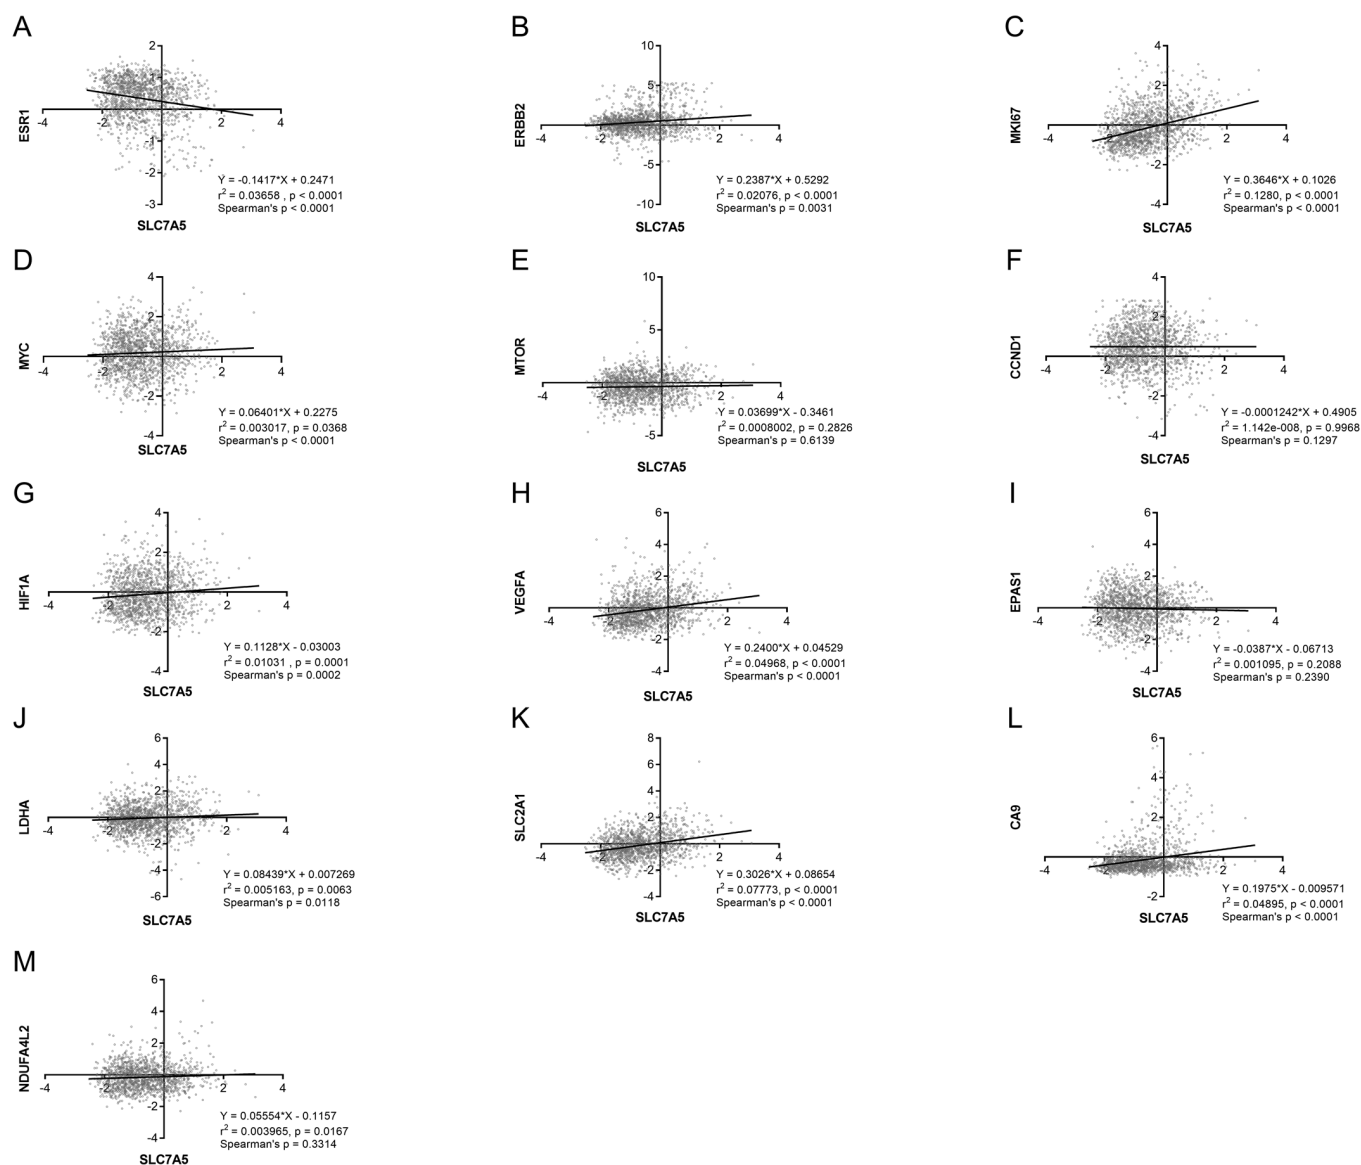

Figure S3. Correlation between SLC7A5 mRNA expression and expression of genes related to breast cancer, hypoxia and cell metabolism in all tumors regardless of ER-status (METABRIC, n=1,903). Correlation between SLC7A5 expression and expression of (A) ESR1, (B) ERBB2, (C) MKI67, (D) MYC, (E) MTOR, (F) CCND1, (G) HIF1A, (H) VEGFA, (I) EPAS1, (J) LDHA, (K) SLC2A1, (L) CA9 and (M) NDUFA4L2. SLC7A5, solute carrier family 7 member 5; ESR1, estrogen receptor 1; ERBB2, Erb-B2 receptor tyrosine kinase 2; MYC, MYC proto-oncogene, BHLH transcription factor; MTOR, mechanistic target of rapamycin; MKI67, marker of proliferation Ki-67; CCND1, cyclin D1; HIF1A, hypoxia inducible factor 1 subunit alpha; EPAS1, endothelial PAS domain-containing protein 1; VEGFA, vascular endothelial growth factor A; LDHA, lactate dehydrogenase A; SLC2A1, solute carrier family 2, facilitated glucose transporter member 1; CAIX, carbonic anhydrase IX; NDUFA4L2, NDUFA4 mitochondrial complex associated like 2.

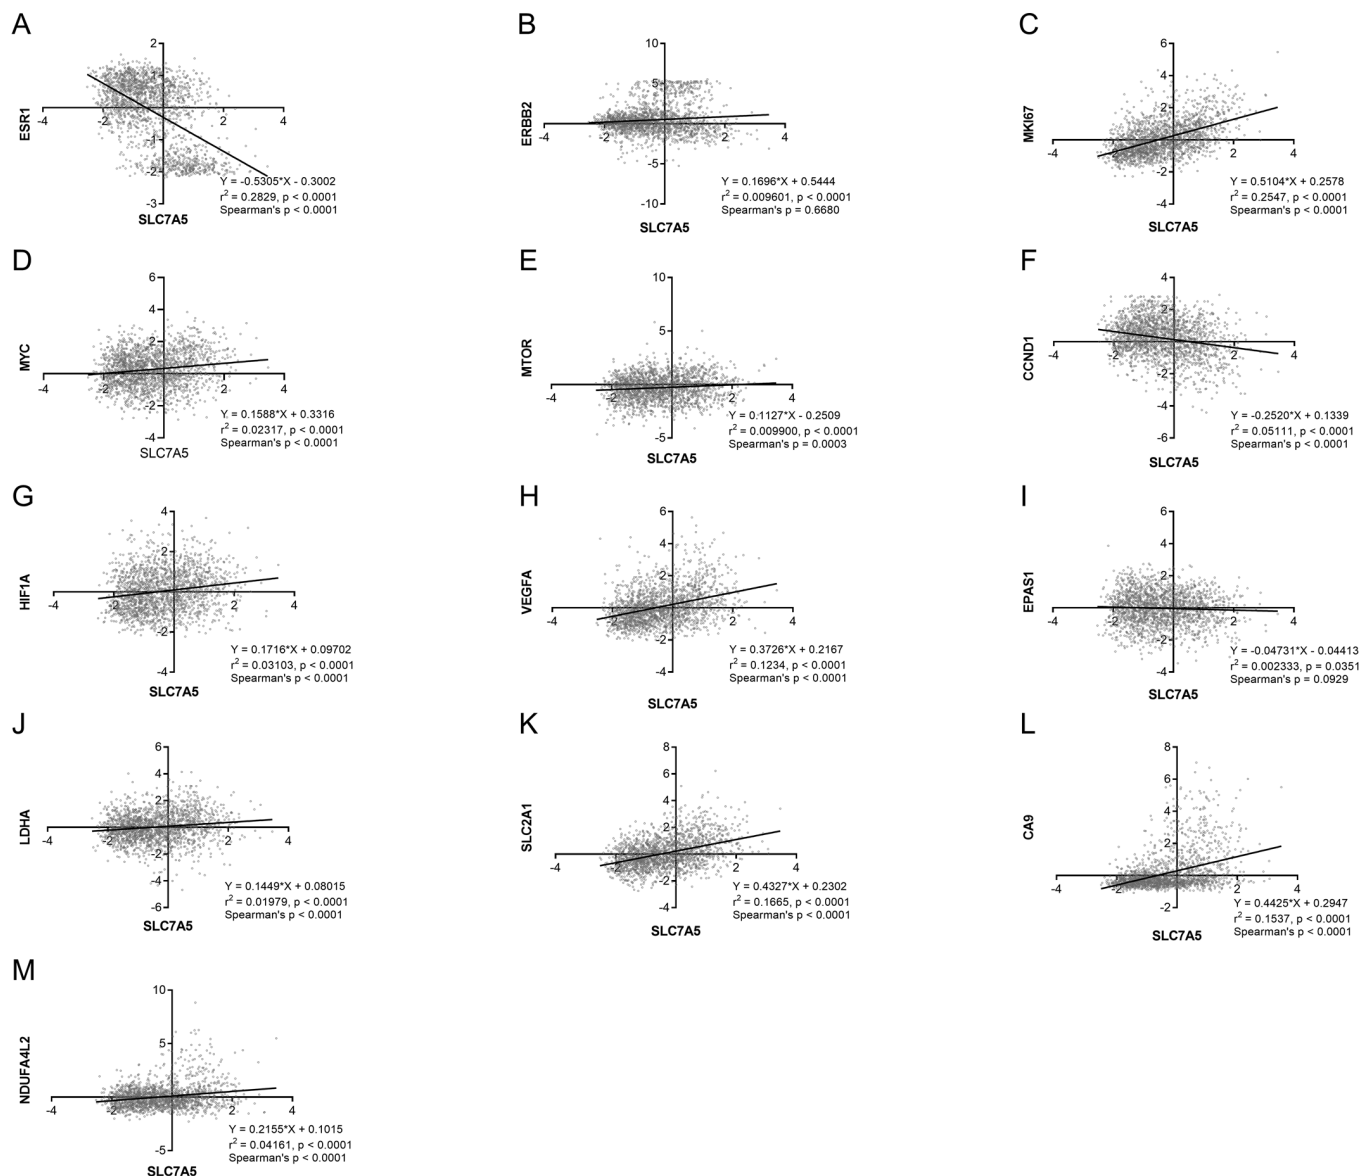

Figure S4. Correlation between SLC7A5 mRNA expression and expression of genes related to breast cancer and hypoxia related in all breast cancer tumors (METABRIC, n=1903). Color coded according to ER-status. Correlation between SLC7A5 expression and expression of (A) ESR1, (B) ERBB2, (C) MKI67, (D) MYC, (E) MTOR, (F) CCND1, (G) HIF1A, (H) VEGFA, (I) EPAS1, (J) LDHA, (K) SLC2A1, (L) CA9 and (M) NDUFA4L2. SLC7A5, solute carrier family 7 member 5; ESR1, estrogen receptor 1; ERBB2, Erb-B2 receptor tyrosine kinase 2; MYC, MYC proto-oncogene, BHLH transcription factor; MTOR, mechanistic target of rapamycin; MKI67, marker of proliferation Ki-67; CCND1, cyclin D1; HIF1A, hypoxia inducible factor 1 subunit alpha; EPAS1, endothelial PAS domain-containing protein 1; VEGFA, vascular endothelial growth factor A; LDHA, lactate dehydrogenase A; SLC2A1, solute carrier family 2, facilitated glucose transporter member 1; CAIX, carbonic anhydrase IX; NDUFA4L2, NDUFA4 mitochondrial complex associated like 2.

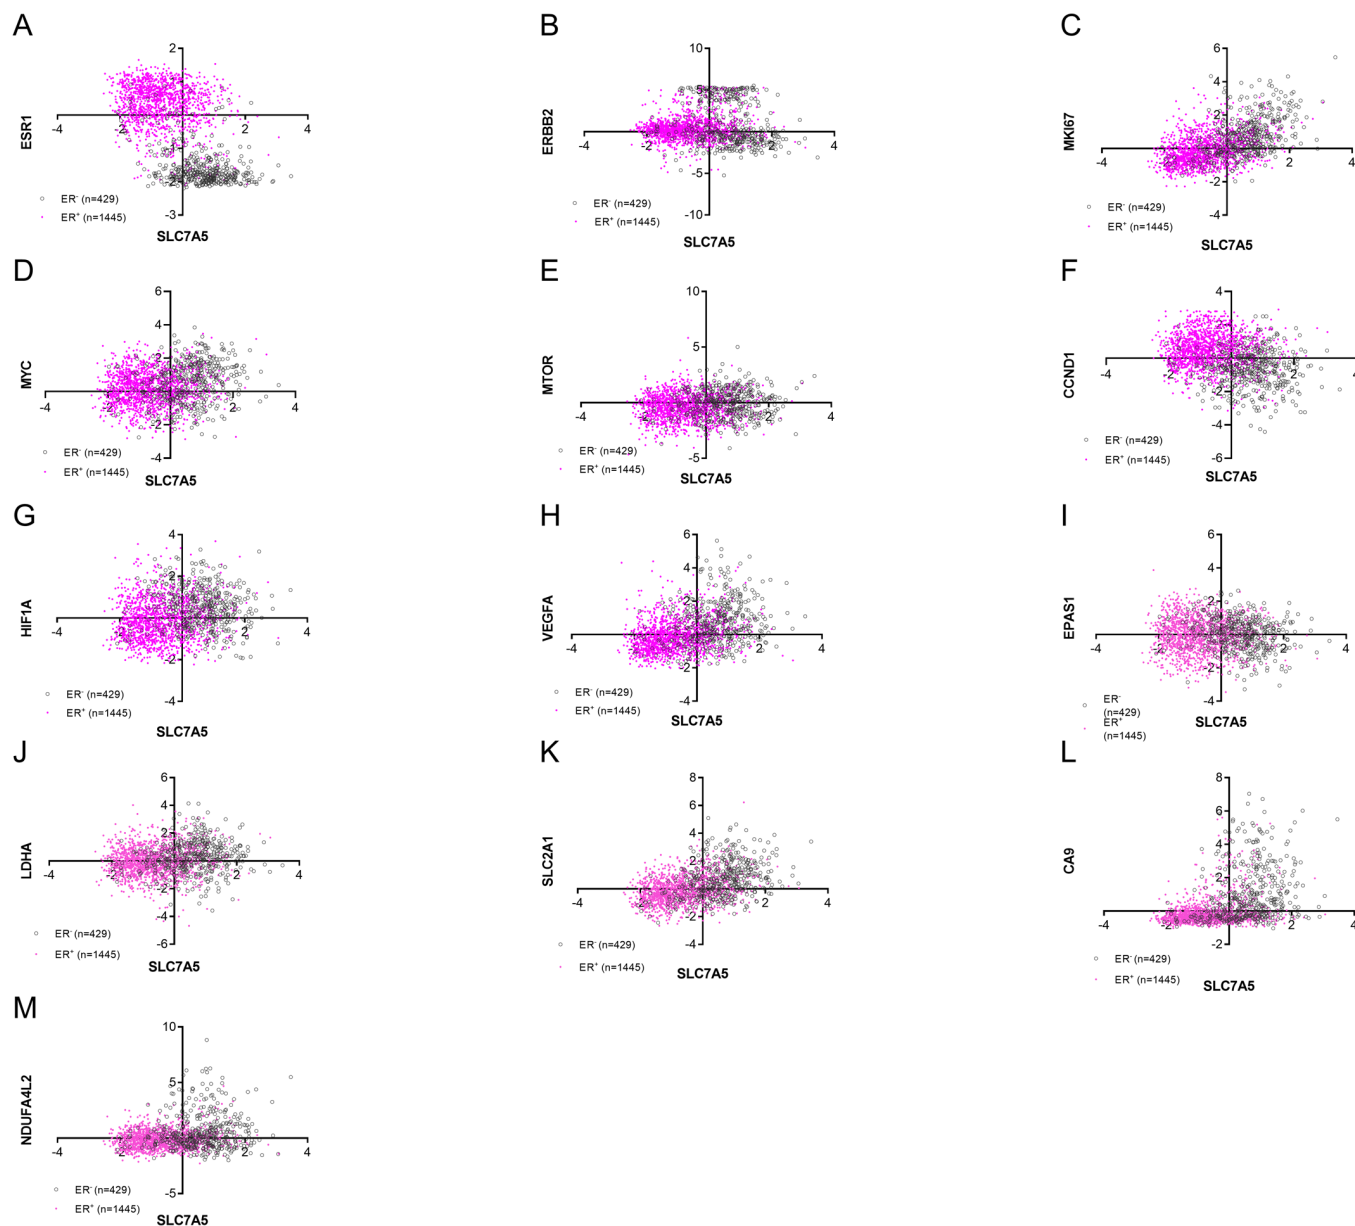

Table SI. Associations between SLC7A5 protein expression and clinicopathological characteristics in patients with ER<sup>+</sup> breast cancer (n=152).

|                             | SLC7A5 negative<br>expression (n, %)           | SLC7A5 positive<br>expression (n, %)         |                    |
|-----------------------------|------------------------------------------------|----------------------------------------------|--------------------|
|                             | SLC7A5 protein score                           |                                              | P-value            |
| Variables                   | 0 (106, 69.7) 1+ (23, 15.1)<br>Median (LQ, UQ) | 2+ (17, 11.2) 3+ (6, 4.0)<br>Median (LQ, UQ) |                    |
| Age of diagnosis, years     | 62.1 (52.3, 77.3)                              | 60.1 (52.5, 77.8)                            | 0.90               |
| Age range, years            | 35.8-92.8                                      | 41.0-86.1                                    |                    |
| Tumour size, mm             | 24 (17, 35)                                    | 28 (17, 35)                                  | 0.37               |
|                             | Case number (n, %)                             | Case number (n, %)                           |                    |
| Menopausal status           |                                                |                                              |                    |
| Premenopausal               | 29 (85.3)                                      | 5 (14.7)                                     | 1.00               |
| Postmenopausal              | 97 (84.3)                                      | 18 (15.7)                                    |                    |
| Unknown                     | 3 (100)                                        | 0 (0)                                        |                    |
| Lymph node infiltration     |                                                |                                              |                    |
| No                          | 43 (79.6)                                      | 11 (20.4)                                    | 0.24               |
| Yes                         | 85 (87.6)                                      | 12 (12.4)                                    |                    |
| Distant recurrence          |                                                |                                              |                    |
| No                          | 99 (87.6)                                      | 14 (12.4)                                    | 0.10               |
| Yes                         | 30 (76.9)                                      | 9 (23.1)                                     |                    |
| Nottingham Histologic Score |                                                |                                              |                    |
| 1                           | 17 (100)                                       | 0 (0)                                        | 0.014 <sup>a</sup> |
| 2                           | 84 (87.5)                                      | 12 (12.5)                                    |                    |
| 3                           | 28 (71.8)                                      | 11 (28.2)                                    |                    |
| Histological type           |                                                |                                              |                    |
| Ductal carcinoma            | 110 (83.3)                                     | 22 (16.7)                                    | 0.58               |
| Lobular carcinoma           | 17 (94.4)                                      | 1 (5.6)                                      |                    |
| Miscellaneous               | 2 (100)                                        | 0 (0)                                        |                    |
| PR-status                   |                                                |                                              |                    |
| Negative                    | 17 (70.8)                                      | 7 (29.2)                                     | 0.058              |
| Positive                    | 111 (87.4)                                     | 16 (12.6)                                    |                    |
| HER2-status                 |                                                |                                              |                    |
| Negative                    | 85 (82.5)                                      | 18 (17.5)                                    | 0.30               |
| Positive                    | 10 (71.4)                                      | 4 (28.6)                                     |                    |

<sup>a</sup>P<0.05. LQ, lower quadrant ; UQ, upper quadrant.
